# Supplementary material for: A Flavonoid Glycoside Compound from Siraitia grosvenorii with Anti-Inflammatory and Hepatoprotective Effects In Vitro
Source: MDPI journal article supplement (doi:10.3390/biom14040450), 2024-04-07
Supplement: s1 [file s1]

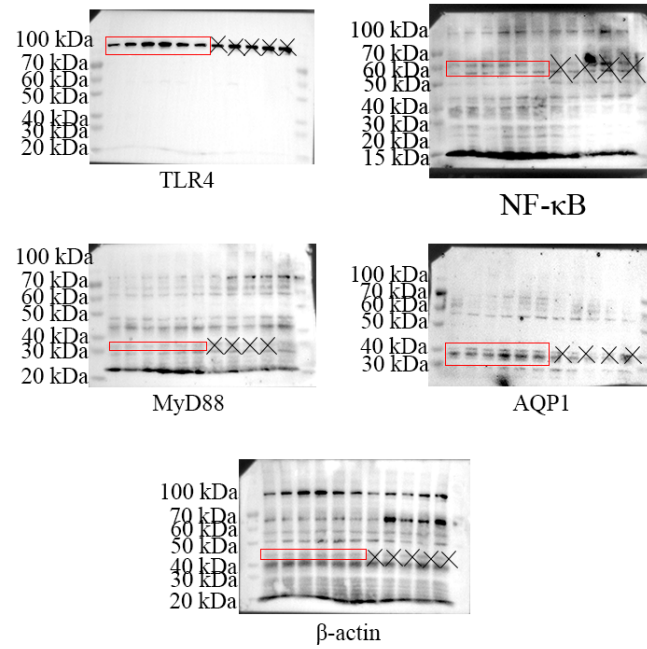

**Figure S6** The samples derive from the same experiment and that blots were processed in parallel.

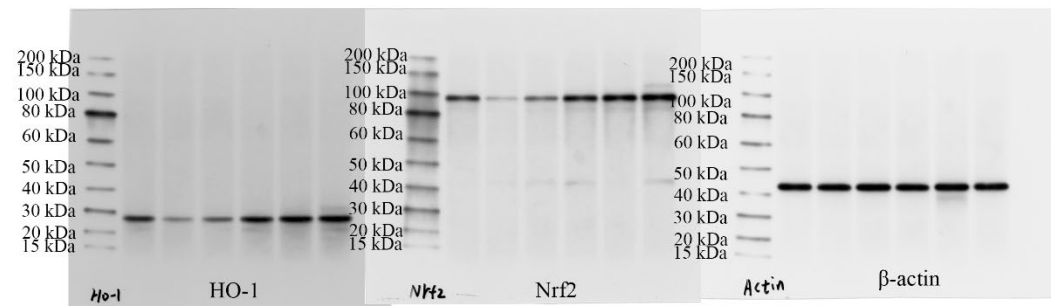

**Figure S7** The samples derive from the same experiment and that blots were processed in parallel.
