# Supplementary material for: A Flavonoid Glycoside Compound from Siraitia grosvenorii with Anti-Inflammatory and Hepatoprotective Effects In Vitro
Source: MDPI journal article supplement (doi:10.3390/biom14040450), 2024-04-07
Supplement: s1 [file s1]

## Supplementary Materials

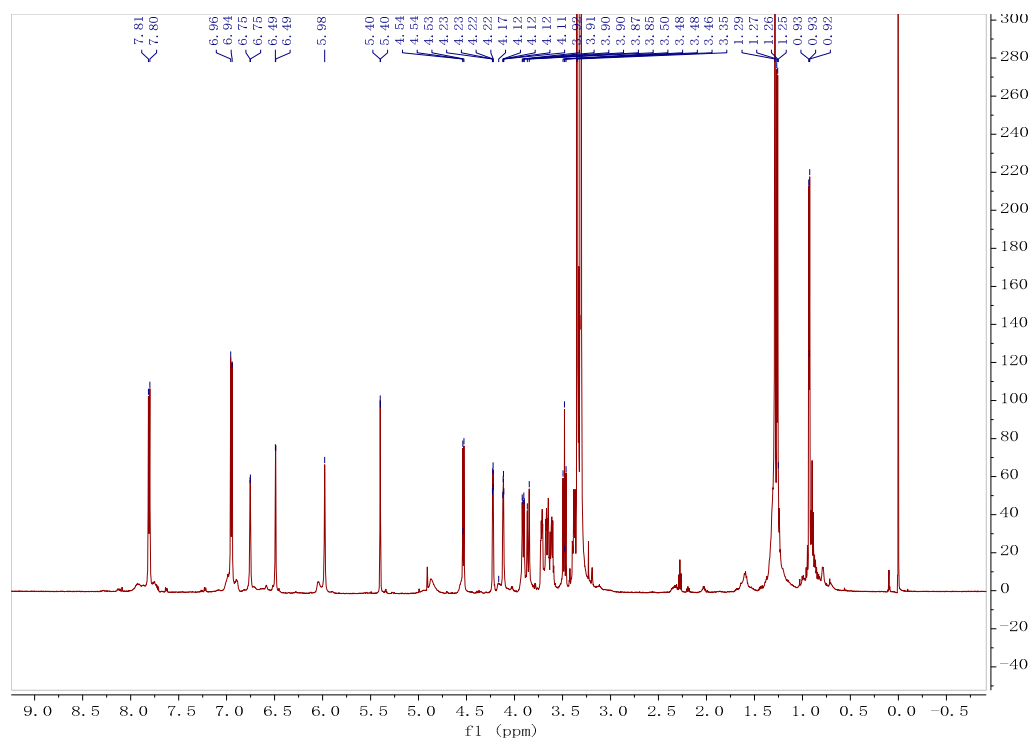

**Figure S1.** <sup>1</sup>H-NMR of SGPF

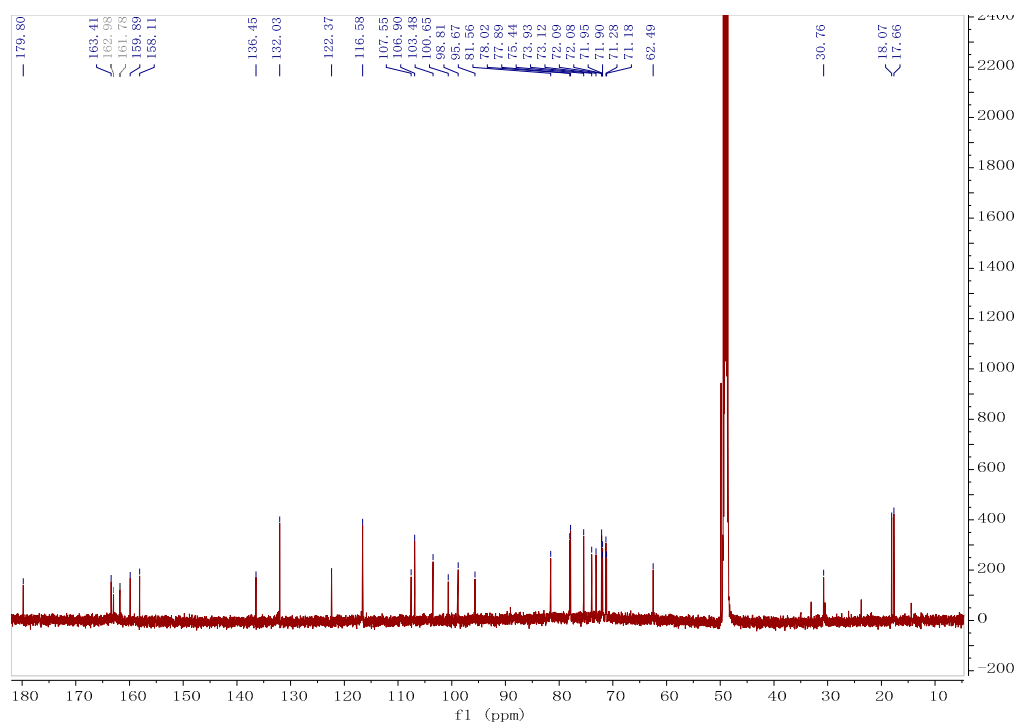

**Figure S2.** <sup>13</sup>C-NMR of SGPF

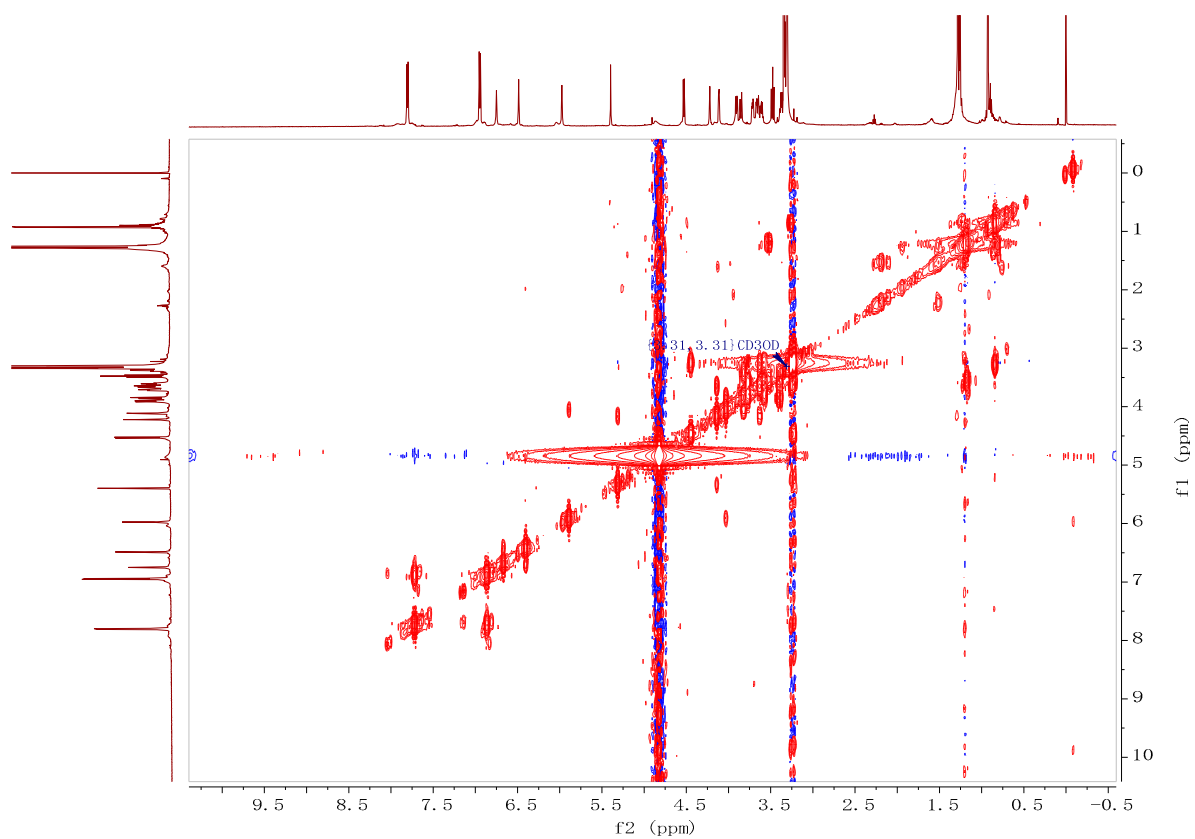

**Figure S3.** 1H-1H COSY of SGPF

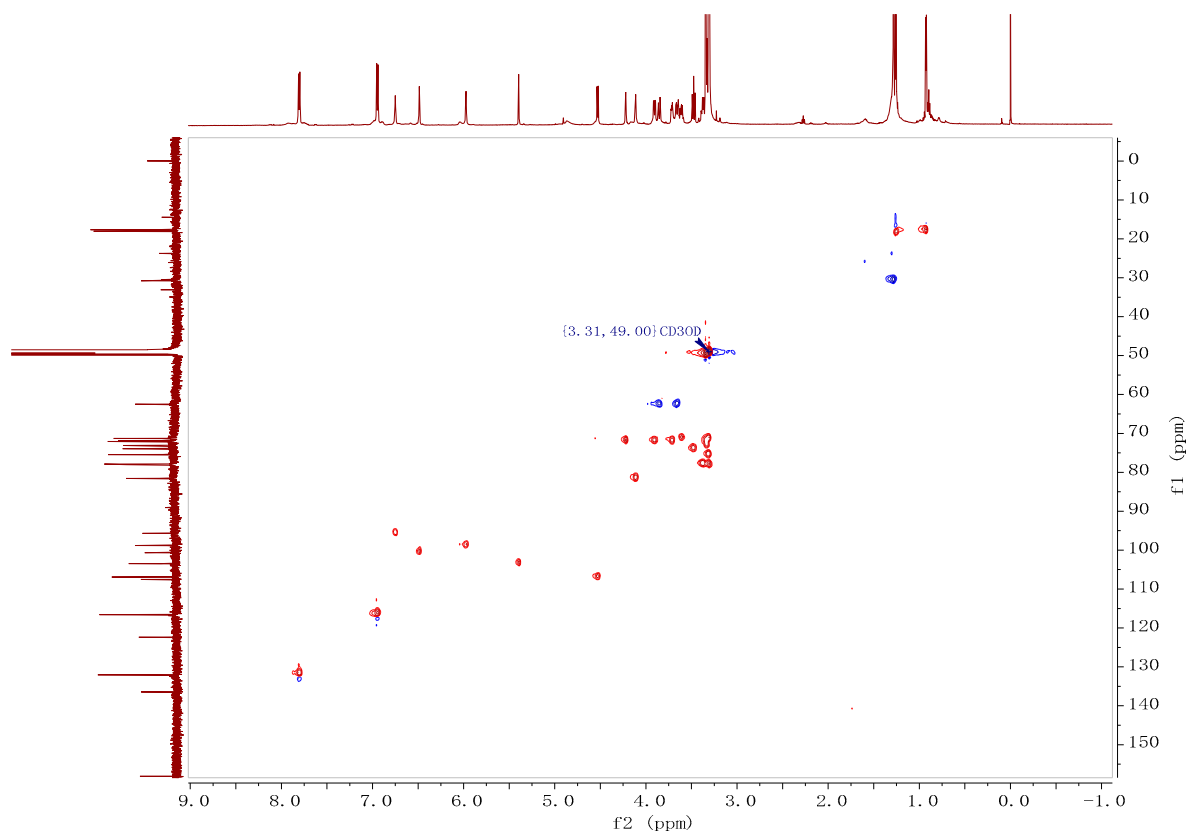

**Figure S4.** HSQC of SGPF

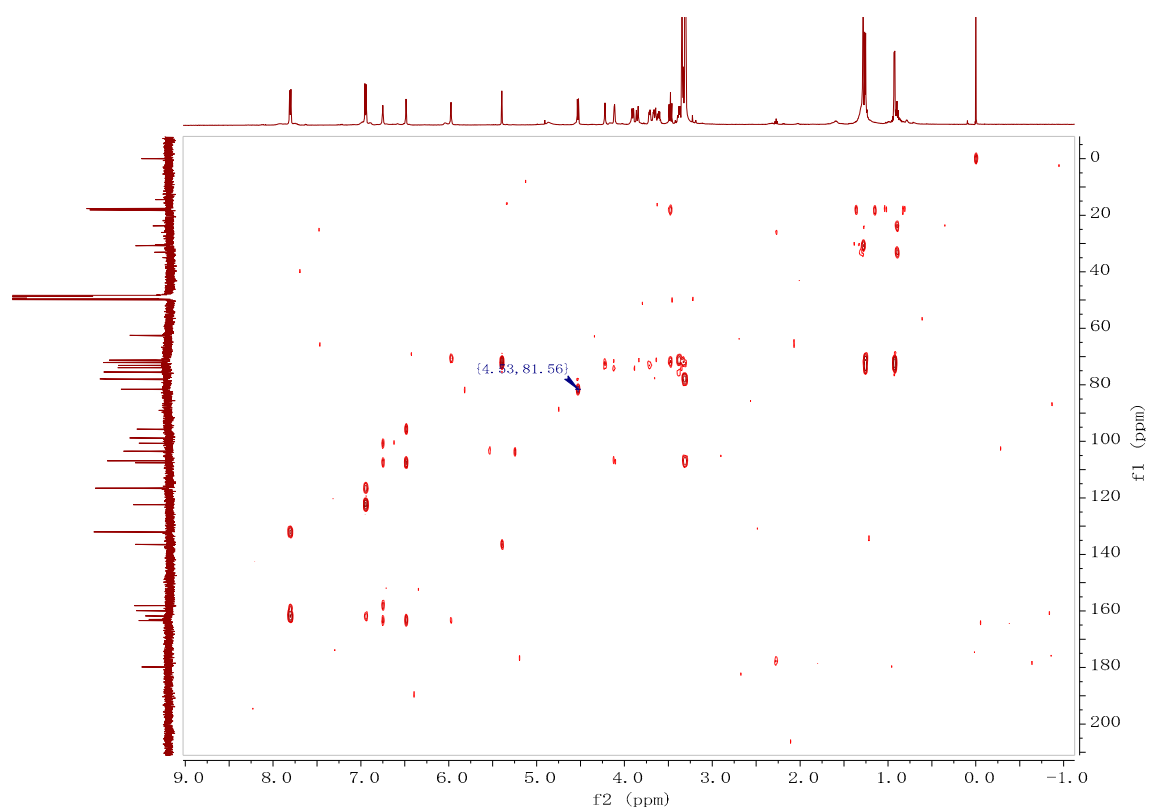

**Figure S5.** HMBC of SGPF
